# Supplementary material
Source: PubMed Central journal article supplement (PMC8713427)
Supplement: NIHMS1765539-supplement-Zierden_supplementary_material.pdf [file NIHMS1765539-supplement-Zierden_supplementary_material.pdf]

## Supplementary Materials for

### **Enhanced drug delivery to the reproductive tract using nanomedicine reveals therapeutic options for prevention of preterm birth**

Hannah C. Zierden, Jairo I. Ortiz, Kevin DeLong, Jingqi Yu, Gaoshan Li, Peter Dimitrion, Sabrine Bensouda, Victoria Laney, Anna Bailey, Nicole M. Anders, Morgan Scardina, Mala Mahendroo, Sam Mesiano, Irina Burd, Gunter Wagner, Justin Hanes, Laura M. Ensign\*

\*Corresponding author. Email: [lensign@jhmi.edu](mailto:lensign@jhmi.edu)

Published 13 January 2021, *Sci. Transl. Med.* **13**, eabc6245 (2021)  
DOI: 10.1126/scitranslmed.abc6245

#### **This PDF file includes:**

- Fig. S1. PTB prevention for various doses of P4 with TSA.
- Fig. S2. PTB prevention for F127 vehicle control.
- Fig. S3. Histogram of litter sizes.
- Fig. S4. Individual litter pup viability.
- Fig. S5. Amniotic fluid endotoxin quantification.
- Fig. S6. TSA metabolite PK.
- Fig. S7. PK for 1 mg of P4 dosed alone.
- Fig. S8. AUC for PK studies.
- Fig. S9. Cervical gene expression.
- Fig. S10. PHM1-41 cell viability.
- Table S1. Formulation optimization for TSA NS.
- Table S2. Pup behavior fail rates.
- Table S3. Antibodies used in Western blotting.
- Table S4. Primer sequences.

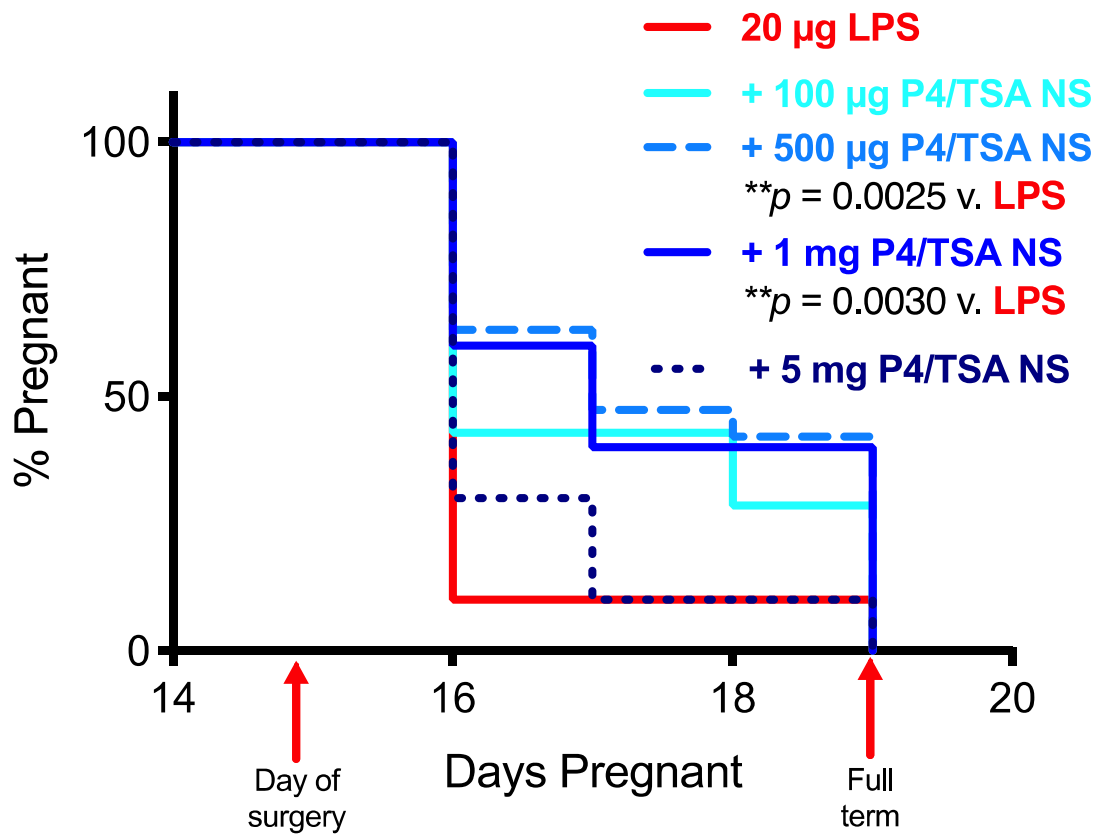

**Fig. S1. PTB prevention for various doses of P4 with TSA.** Pregnancy survival curves showing the percentage of animals remaining pregnant after DDI of 20 µg LPS (n=20) on E15. Daily vaginal administration of 15 µg TSA NS with either 100 µg P4 NS (n=7), 500 µg P4 NS (n=19), 1 mg P4 NS (n=20, repeated from Figure 3B), or 5 mg P4 NS (n=10). \* $p < 0.01$ , via Mantel-Cox test.

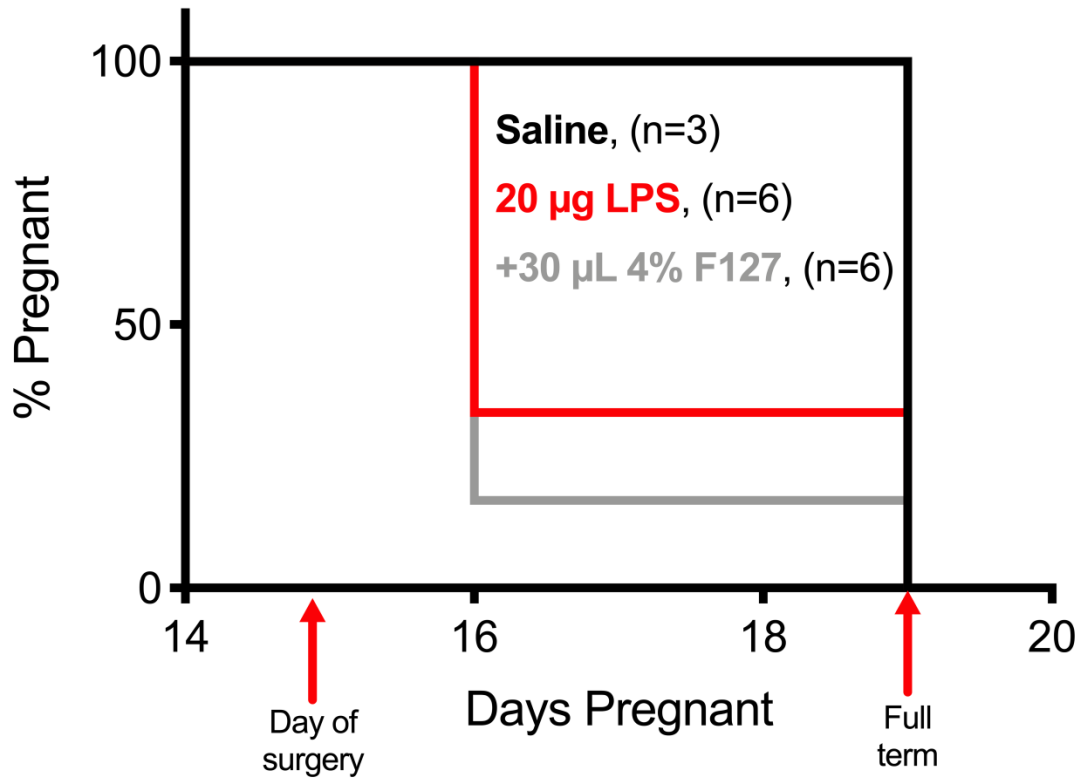

**Fig. S2. PTB prevention for F127 vehicle control.** Pregnancy survival curves showing the percentage of animals remaining pregnant after DDI of LPS on E15. Daily vaginal administration of 4% F127 vehicle control (n=6) had no effect on PTB induction after 20 µg LPS alone (n=6).

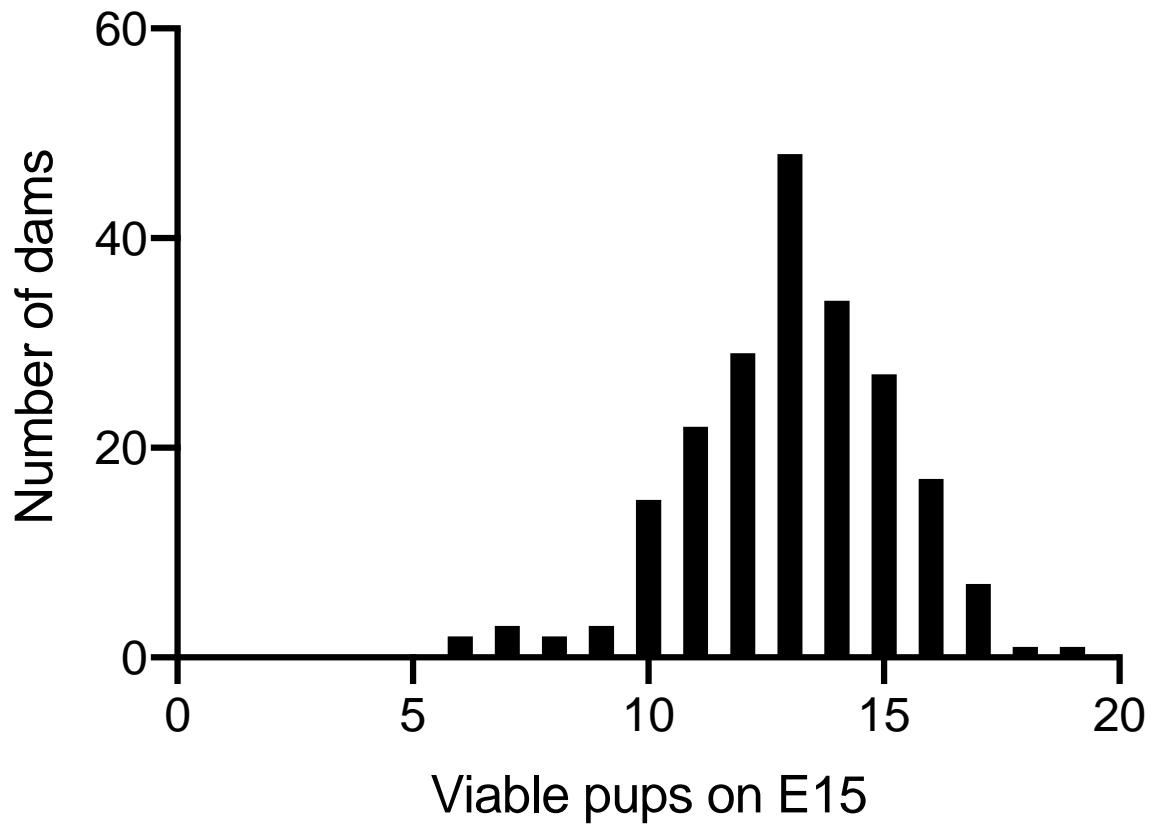

**Fig. S3. Histogram of litter sizes.** Litter size was counted on E15 at the time of surgery, and included only viable pups.

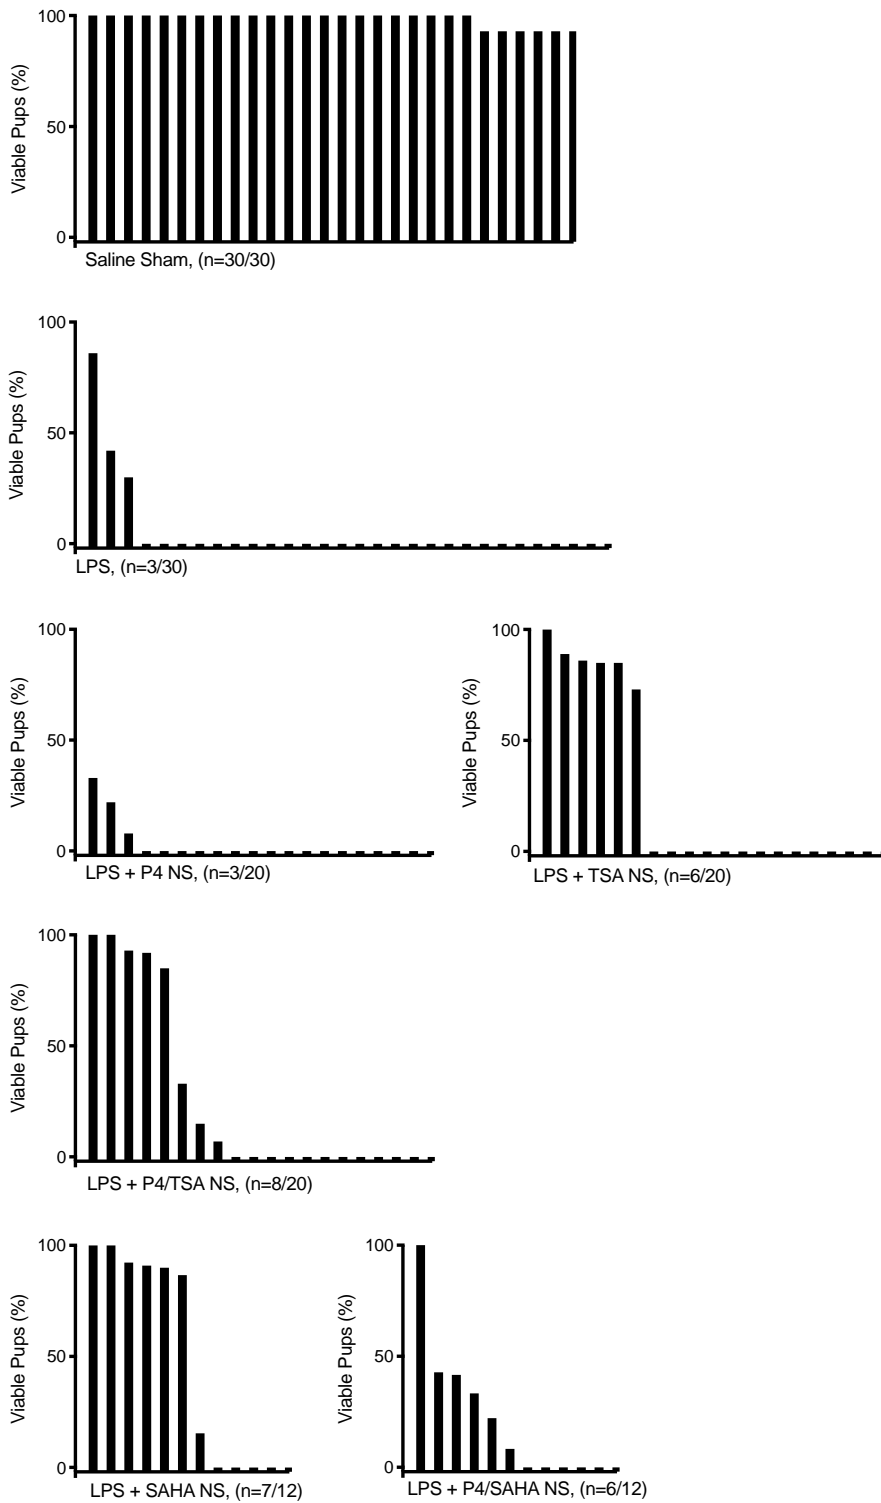

**Fig. S4. Individual litter pup viability.** For term litters, percentage of pups born live compared to viable pups counted on E15. Each bar represents an individual litter for saline sham, LPS (20  $\mu$ g), LPS + P4 NS (1 mg), LPS + TSA NS (15  $\mu$ g), LPS + P4/TSA NS (1 mg/15  $\mu$ g), LPS + SAHA NS (15  $\mu$ g), or LPS + P4/SAHA NS (1 mg/15  $\mu$ g). Litters delivered prematurely are shown as 0% viability. The number of live litters out of the total is shown below each plot.

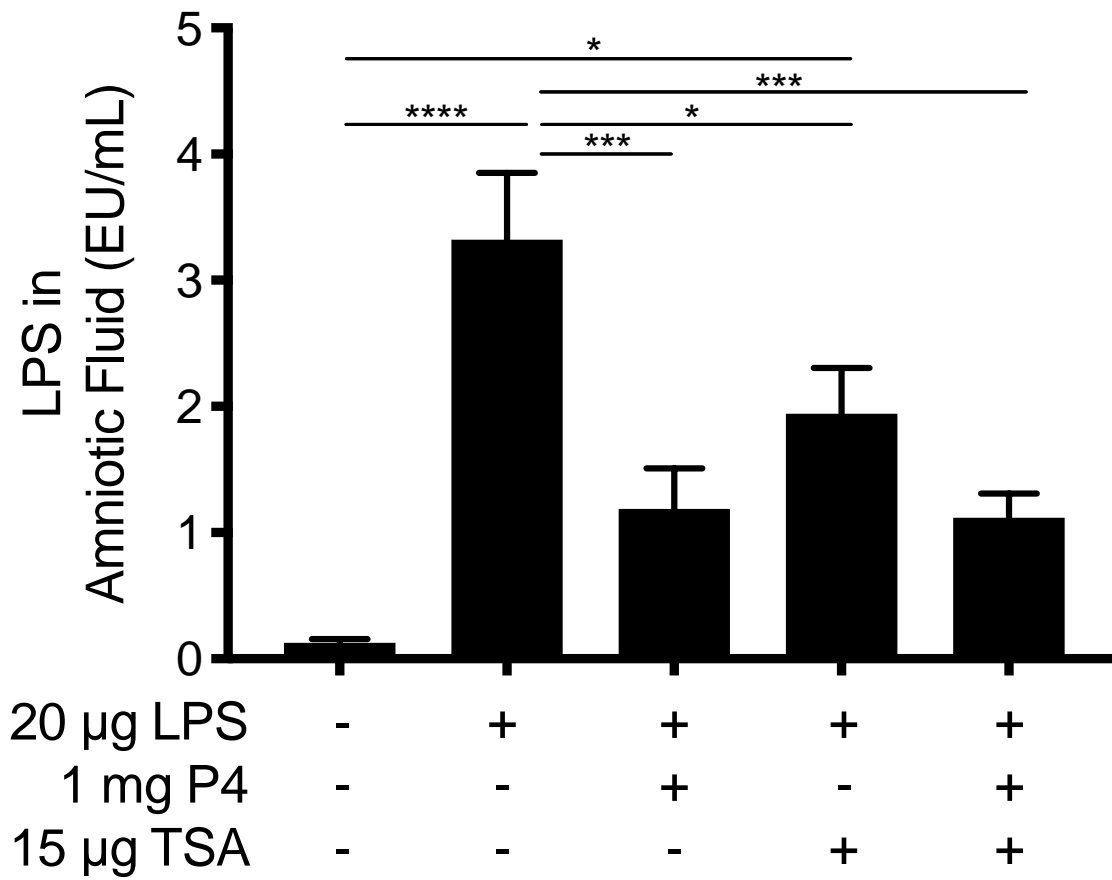

**Fig. S5. Amniotic fluid endotoxin quantification.** Endotoxin quantification from pooled amniotic fluid collected 8 h after surgery. Data are shown as mean  $\pm$  SEM ( $n \geq 8$  dams). \* $p < 0.05$ , \*\*\*  $p < 0.001$ , \*\*\*\*  $p < 0.0001$ .

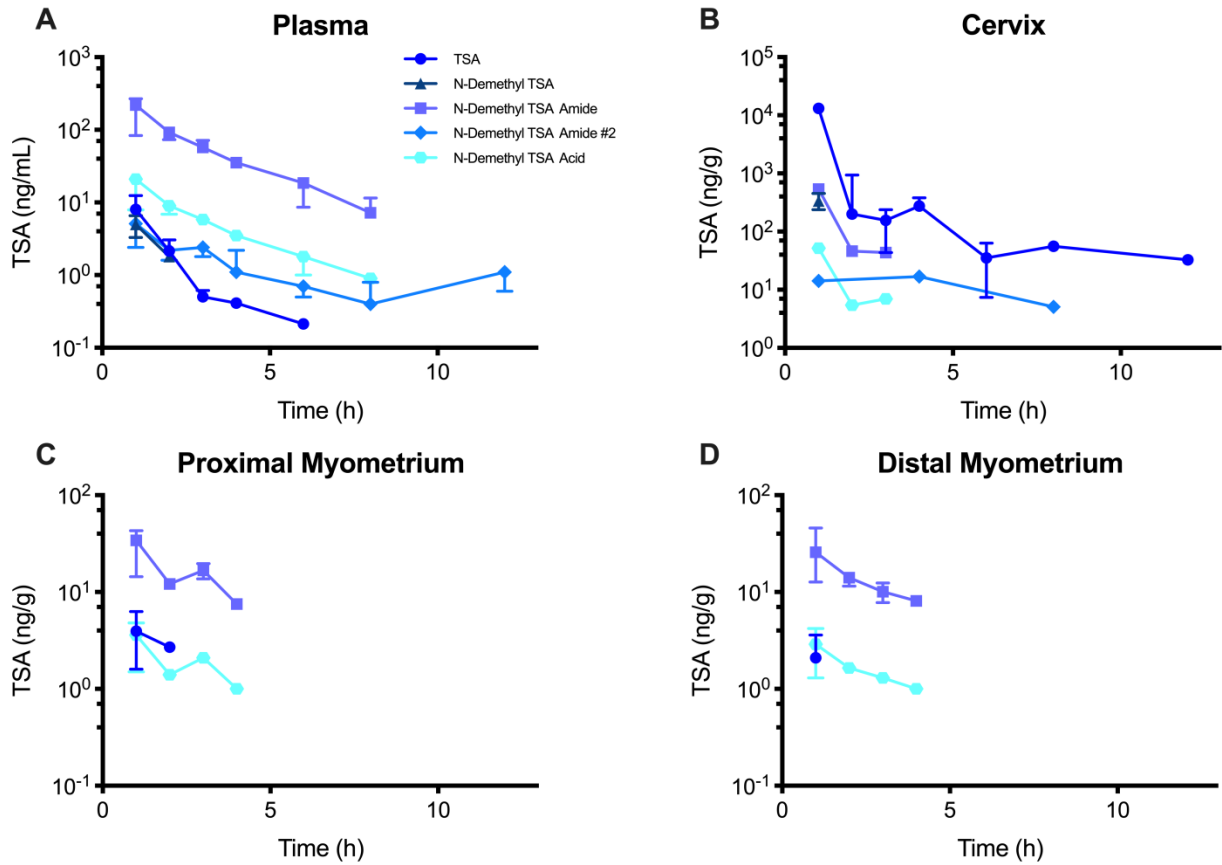

**Fig. S6. TSA metabolite PK.** Approximate concentrations of active metabolites of TSA in (A) plasma, (B) cervical tissue, (C) proximal myometrial tissue, and (D) distal myometrial tissue collected from healthy dams after a single vaginal P4/TSA (1 mg/15  $\mu$ g) NS dose on E15. All metabolites were analyzed at all time points. Omission of data at later timepoints indicates that metabolite concentrations were below the lower limit of quantification. Data are presented as median  $\pm$  interquartile range (n=3).

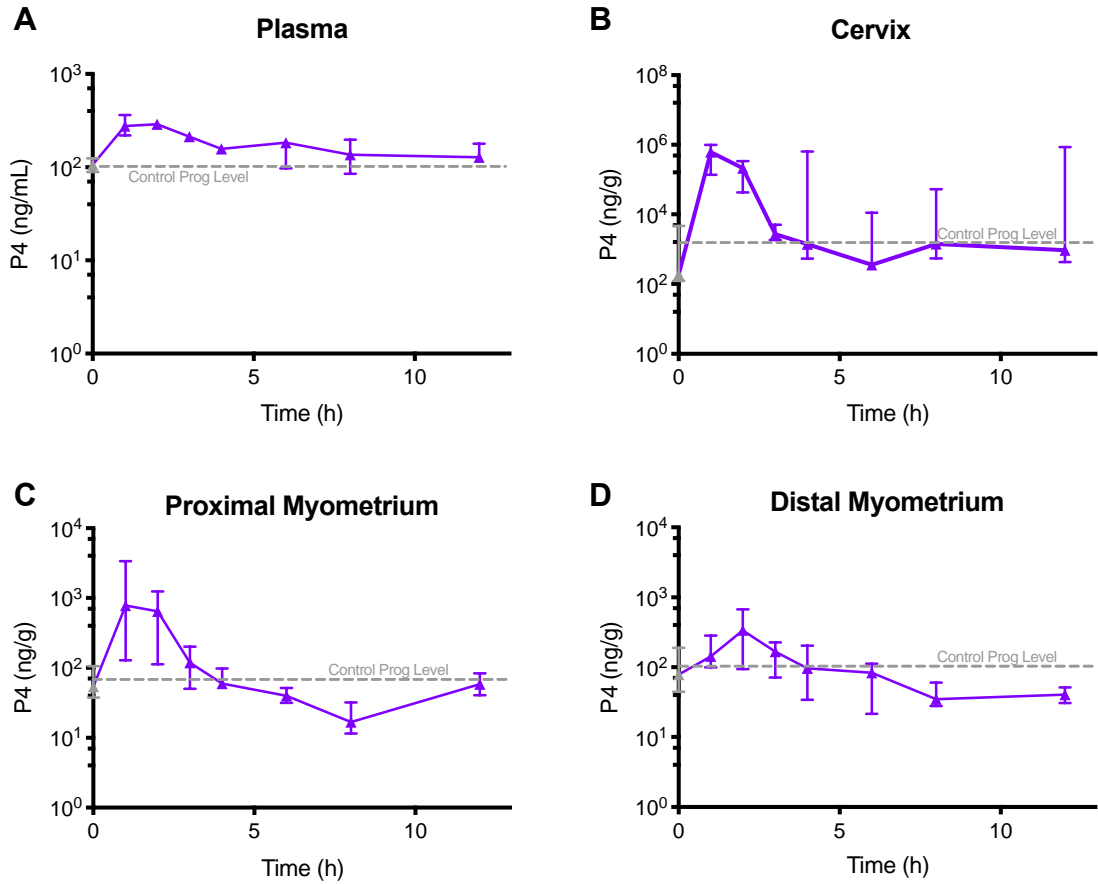

**Fig. S7. PK for 1 mg of P4 dosed alone.** P4 concentrations in (A) plasma, (B) cervical tissue, (C) proximal myometrial tissue, and (D) distal myometrial tissue collected from healthy dams after a single vaginal P4 (1 mg) NS dose E15. Gray dashed lines represent mean endogenous concentrations of P4 from untreated healthy E15 dams. Data are presented as median  $\pm$  interquartile range (n=3).



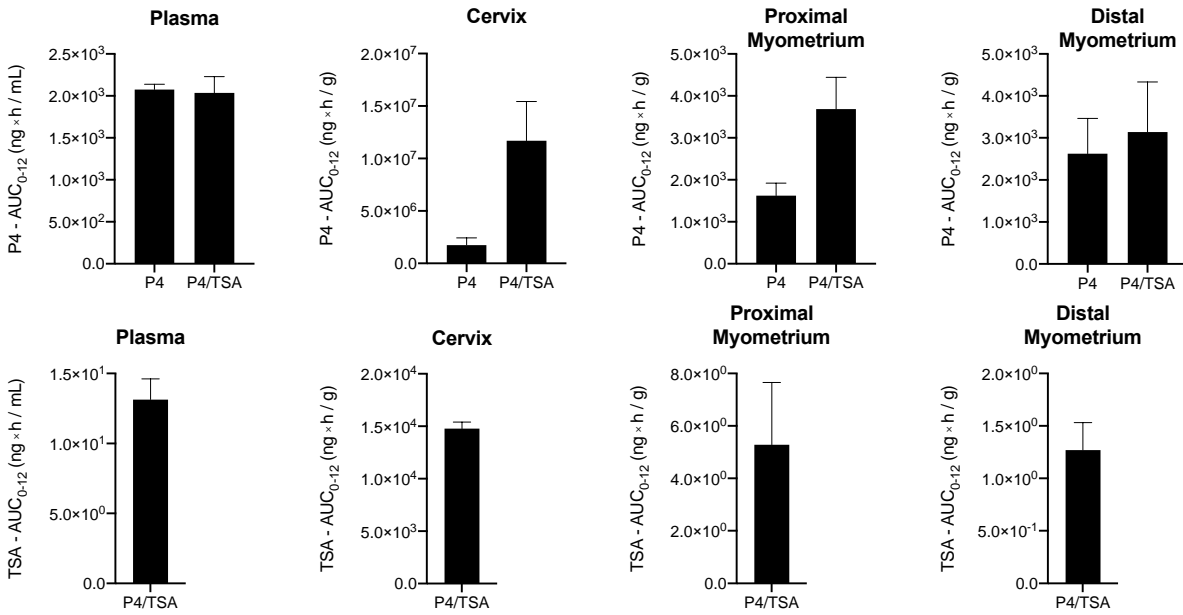

**Fig. S8. AUC for PK studies.** AUC for P4 (top row) or TSA (bottom row) over 12 h ( $AUC_{0-12}$ ) after a single vaginal dose of P4 (1 mg) or P4/TSA (1 mg/15  $\mu$ g). AUC calculations were performed using WinNonLin software. Data are presented as mean  $\pm$  SEM (n=3).

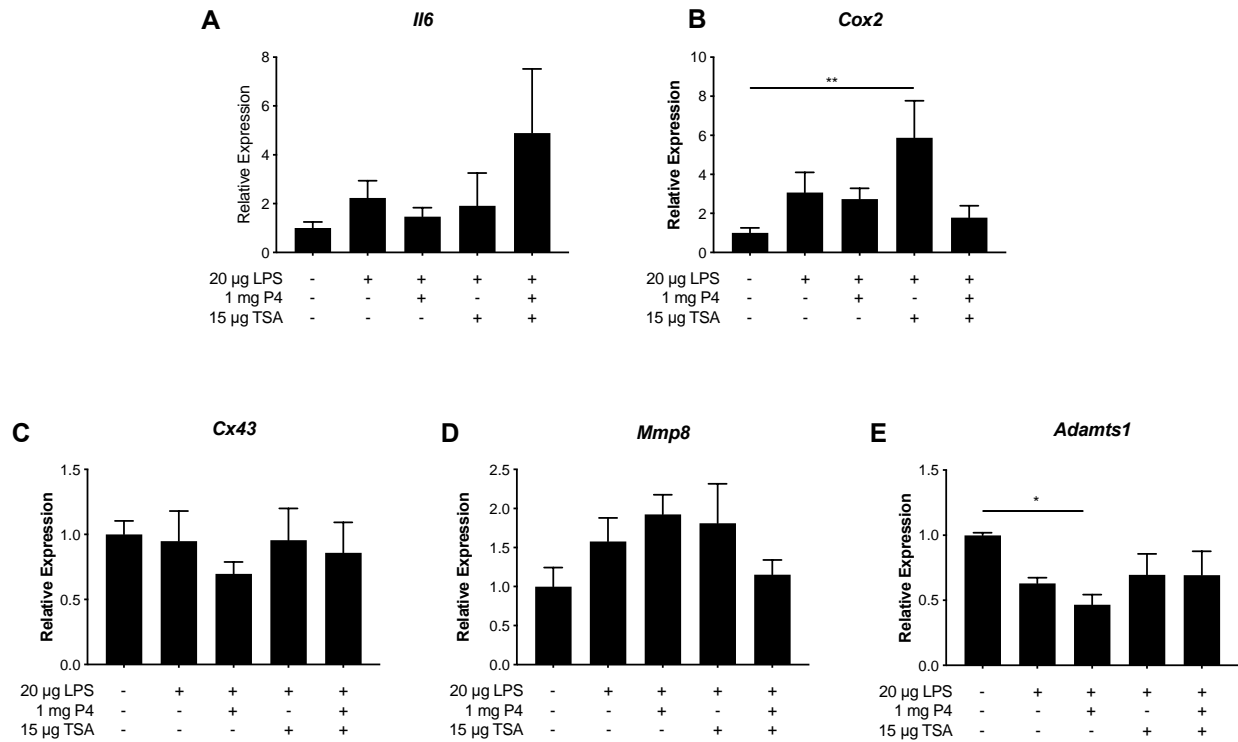

**Fig. S9. Cervical gene expression.** Relative gene expression of (A) *Il6*, (B) *Cox2*, (C) *Cx43*, (D) *Mmp8*, and (E) *Adamts1* from cervical tissue from dams receiving a DDI of saline or DDI of LPS with no treatment, vaginal P4 NS (1 mg), TSA NS (15 µg), or P4/TSA NS (1 mg/15 µg). Treatment occurred immediately after surgery. Tissue was collected 8 h post-surgery. Gene expression was analyzed using the  $\Delta\Delta\text{Ct}$  method, using *Rplp0* as the housekeeping gene. Results are presented as expression relative to the saline sham group. Data are shown as mean  $\pm$  SEM ( $n \geq 5$ ). \*  $p < 0.05$ , \*\*  $p < 0.01$ .

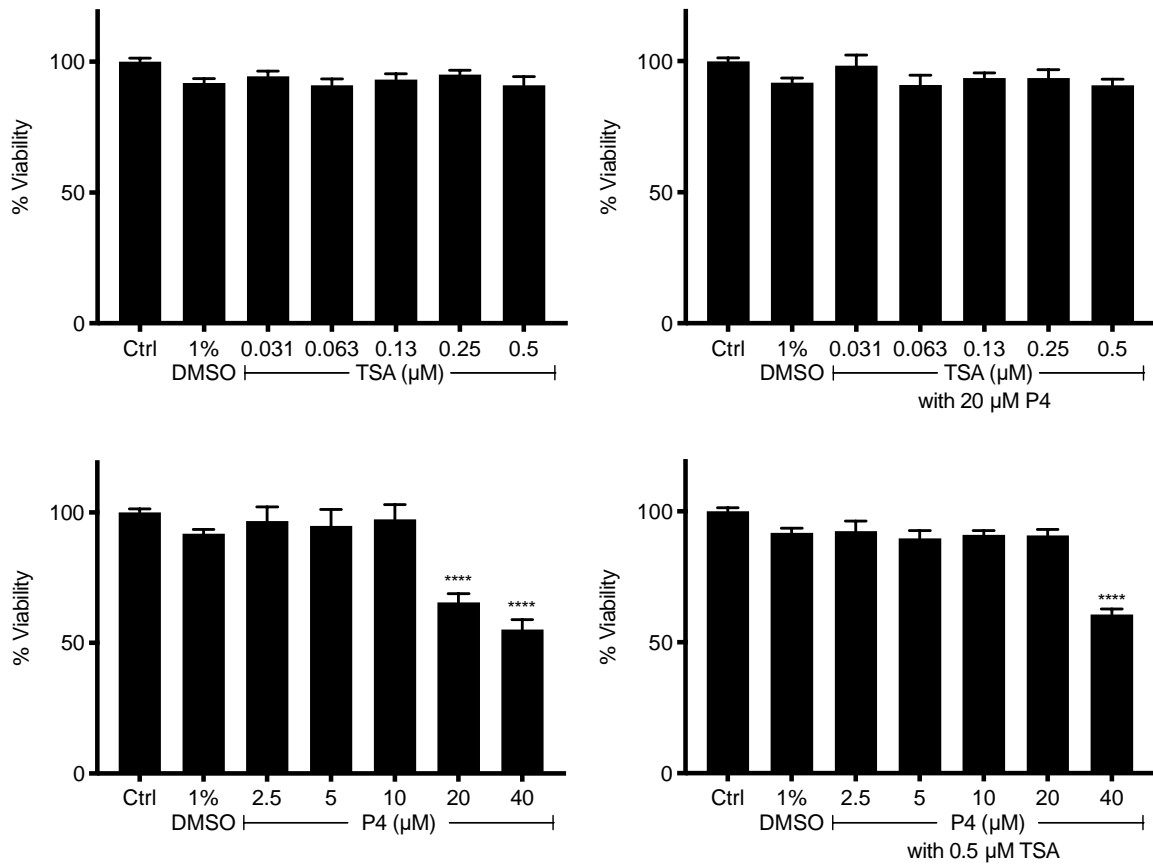

**Fig. S10. PHM1-41 cell viability.** PHM1-41 viability after 24 h incubation with P4, TSA, or P4 with TSA. Data are shown as mean  $\pm$  SEM ( $n \geq 6$ ). \*\*\*\*  $p < 0.0001$  compared to untreated cells (Ctrl).

**Table S1. Formulation optimization for TSA NS.** Formulation no. 20 was used for studies described in the main manuscript. Pluronic F127 and additional stabilizer percentages are weight/volume in water. Size, PDI, and  $\zeta$ -potential are represented as mean  $\pm$  SD (n=3).

| No.       | Tube Size         | Bead Type    | Bead Mass    | F127 Concentration | Additional Stabilizer | Size (nm)                          | PDI                               | $\zeta$ -potential (mV)            |
|-----------|-------------------|--------------|--------------|--------------------|-----------------------|------------------------------------|-----------------------------------|------------------------------------|
| 1         | 2mL tube          | ZSBO5        | 2.0 g        | 4%                 | -                     | 192.3 $\pm$ 4.9                    | 0.19 $\pm$ 0.07                   | 2.12 $\pm$ 0.39                    |
| 2         | 2mL tube          | ZrOBO5       | 2.0 g        | 4%                 | -                     | 175.67 $\pm$ 31.5                  | 0.45 $\pm$ 0.13                   | -1.11 $\pm$ 0.54                   |
| 3         | 2mL tube          | ZrOBO15      | 2.0 g        | 4%                 | -                     | 139.37 $\pm$ 22.7                  | 0.42 $\pm$ 0.11                   | -4.69 $\pm$ 1.82                   |
| 4         | 1.5mL tube        | ZSBO5        | 1.0 g        | 4%                 | -                     | 214.23 $\pm$ 6.4                   | 0.22 $\pm$ 0.04                   | -2.08 $\pm$ 0.26                   |
| 5         | 1.5mL tube        | ZrOBO5       | 1.0 g        | 4%                 | -                     | 304.63 $\pm$ 149.6                 | 0.6 $\pm$ 0.25                    | -0.9 $\pm$ 0.46                    |
| 6         | 1.5mL tube        | ZrOBO15      | 1.0 g        | 4%                 | -                     | 309.9 $\pm$ 77                     | 0.33 $\pm$ 0.06                   | 1.08 $\pm$ 1.97                    |
| 7         | 0.5mL tube        | ZSBO5        | 0.5 g        | 4%                 | -                     | 323.73 $\pm$ 23.9                  | 0.32 $\pm$ 0.02                   | 1.68 $\pm$ 0.4                     |
| 8         | 0.5mL tube        | ZrOBO5       | 0.5 g        | 4%                 | -                     | 305.1 $\pm$ 30.3                   | 0.42 $\pm$ 0.13                   | -0.94 $\pm$ 1.22                   |
| 9         | 0.5mL tube        | ZrOBO15      | 0.5 g        | 4%                 | -                     | 337.6 $\pm$ 47.4                   | 0.39 $\pm$ 0.04                   | -0.86 $\pm$ 1.62                   |
| 10        | 2mL tube          | ZSBO5        | 0.2 g        | 4%                 | -                     | 246.93 $\pm$ 20.2                  | 0.31 $\pm$ 0.13                   | -1.04 $\pm$ 0.32                   |
| 11        | 2mL tube          | ZSBO5        | 0.5 g        | 4%                 | -                     | 233.27 $\pm$ 7.3                   | 0.27 $\pm$ 0.12                   | -0.22 $\pm$ 0.27                   |
| 12        | 2mL tube          | ZSBO5        | 1.0 g        | 4%                 | -                     | 218.13 $\pm$ 4.4                   | 0.25 $\pm$ 0.12                   | 0.1 $\pm$ 0.38                     |
| 13        | 2mL tube          | ZSBO5        | 1.5 g        | 4%                 | -                     | 212.73 $\pm$ 7.4                   | 0.22 $\pm$ 0.02                   | -0.16 $\pm$ 0.23                   |
| 14        | 2mL tube          | ZrOBO15      | 0.2 g        | 4%                 | -                     | 473.17 $\pm$ 72.9                  | 0.39 $\pm$ 0.01                   | -1.11 $\pm$ 0.7                    |
| 15        | 2mL tube          | ZrOBO15      | 0.5 g        | 4%                 | -                     | 621.13 $\pm$ 491.7                 | 0.58 $\pm$ 0.36                   | -0.14 $\pm$ 0.37                   |
| 16        | 2mL tube          | ZrOBO15      | 1.0 g        | 4%                 | -                     | 186.97 $\pm$ 9.8                   | 0.64 $\pm$ 0.07                   | 0.2 $\pm$ 0.21                     |
| 17        | 2mL tube          | ZrOBO15      | 1.5 g        | 4%                 | -                     | 1066.63 $\pm$ 1295.3               | 0.57 $\pm$ 0.13                   | -0.61 $\pm$ 1.24                   |
| 18        | 1.5mL tube        | ZSBO5        | 0.2 g        | 4%                 | -                     | 238.57 $\pm$ 22.4                  | 0.28 $\pm$ 0.09                   | -0.41 $\pm$ 0.58                   |
| 19        | 1.5mL tube        | ZSBO5        | 0.5 g        | 4%                 | -                     | 236.1 $\pm$ 9.3                    | 0.22 $\pm$ 0.07                   | -0.11 $\pm$ 0.39                   |
| <b>20</b> | <b>1.5mL tube</b> | <b>ZSBO5</b> | <b>1.5 g</b> | <b>4%</b>          | <b>-</b>              | <b>215.9 <math>\pm</math> 12.9</b> | <b>0.12 <math>\pm</math> 0.07</b> | <b>-0.06 <math>\pm</math> 0.04</b> |
| 21        | 1.5mL tube        | ZSBO5        | 2.0 g        | 4%                 | -                     | 219.8 $\pm$ 10.7                   | 0.27 $\pm$ 0.05                   | 0 $\pm$ 0.39                       |
| 22        | 2mL tube          | ZSBO5        | 1.5 g        | 1%                 | -                     | 252.67 $\pm$ 8.9                   | 0.26 $\pm$ 0.03                   | -2.35 $\pm$ 0.56                   |
| 23        | 2mL tube          | ZSBO5        | 1.5 g        | 2%                 | -                     | 948.57 $\pm$ 44.9                  | 0.43 $\pm$ 0.04                   | -4.54 $\pm$ 1.66                   |
| 24        | 2mL tube          | ZSBO5        | 1.5 g        | 4%                 | -                     | 347.37 $\pm$ 4.1                   | 0.17 $\pm$ 0.09                   | -4.61 $\pm$ 2.39                   |
| 25        | 2mL tube          | ZSBO5        | 1.5 g        | 6%                 | -                     | 213.3 $\pm$ 5.9                    | 0.2 $\pm$ 0.02                    | -2.35 $\pm$ 1.2                    |
| 26        | 1.5mL tube        | ZSBO5        | 0.5 g        | 1%                 | -                     | 483.9 $\pm$ 82.2                   | 0.4 $\pm$ 0.05                    | -4.07 $\pm$ 1.95                   |
| 27        | 1.5mL tube        | ZSBO5        | 0.5 g        | 2%                 | -                     | 338.17 $\pm$ 27.6                  | 0.32 $\pm$ 0.04                   | -2.59 $\pm$ 1.11                   |
| 28        | 1.5mL tube        | ZSBO5        | 0.5 g        | 4%                 | -                     | 319.43 $\pm$ 26.2                  | 0.11 $\pm$ 0.01                   | -1.42 $\pm$ 0.14                   |
| 29        | 1.5mL tube        | ZSBO5        | 0.5 g        | 6%                 | -                     | 462.13 $\pm$ 25.3                  | 0.35 $\pm$ 0.03                   | -0.48 $\pm$ 0.25                   |
| 30        | 2mL tube          | ZSBO5        | 1.5 g        | 4%                 | 1% HS15               | 212.1 $\pm$ 4.6                    | 0.3 $\pm$ 0.02                    | 0.16 $\pm$ 0.35                    |
| 31        | 2mL tube          | ZSBO5        | 1.5 g        | 4%                 | 2% HS15               | 199.93 $\pm$ 3.2                   | 0.29 $\pm$ 0.02                   | -0.04 $\pm$ 0.35                   |
| 32        | 2mL tube          | ZSBO5        | 1.5 g        | 4%                 | 3% HS15               | 238.03 $\pm$ 8.9                   | 0.49 $\pm$ 0.06                   | 0.12 $\pm$ 0.07                    |
| 33        | 2mL tube          | ZSBO5        | 1.5 g        | 4%                 | 1% F68                | 201.5 $\pm$ 1.5                    | 0.16 $\pm$ 0.03                   | -0.39 $\pm$ 0.04                   |
| 34        | 2mL tube          | ZSBO5        | 1.5 g        | 4%                 | 2% F68                | 229.63 $\pm$ 1                     | 0.15 $\pm$ 0.05                   | 0.12 $\pm$ 0.62                    |
| 35        | 2mL tube          | ZSBO5        | 1.5 g        | 4%                 | 3% F68                | 328.7 $\pm$ 19.2                   | 0.42 $\pm$ 0.04                   | 0.24 $\pm$ 0.6                     |
| 36        | 2mL tube          | ZSBO5        | 1.5 g        | 4%                 | 1% TPGS               | 206.33 $\pm$ 4.2                   | 0.17 $\pm$ 0.05                   | 0.52 $\pm$ 0.96                    |
| 37        | 2mL tube          | ZSBO5        | 1.5 g        | 4%                 | 2% TPGS               | 217.83 $\pm$ 4.5                   | 0.25 $\pm$ 0.02                   | 1 $\pm$ 0.57                       |
| 38        | 2mL tube          | ZSBO5        | 1.5 g        | 4%                 | 3% TPGS               | 199.53 $\pm$ 0.8                   | 0.18 $\pm$ 0                      | -0.55 $\pm$ 0.16                   |
| 39        | 1.5mL tube        | ZSBO5        | 0.5 g        | 2%                 | 1% HS15               | 213.33 $\pm$ 9                     | 0.35 $\pm$ 0.05                   | -0.38 $\pm$ 0.67                   |
| 40        | 1.5mL tube        | ZSBO5        | 0.5 g        | 2%                 | 2% HS15               | 304.47 $\pm$ 15.3                  | 0.53 $\pm$ 0.07                   | -0.01 $\pm$ 0.05                   |
| 41        | 1.5mL tube        | ZSBO5        | 0.5 g        | 2%                 | 3% HS15               | 256.53 $\pm$ 11.3                  | 0.6 $\pm$ 0.11                    | 0.92 $\pm$ 0.44                    |
| 42        | 1.5mL tube        | ZSBO5        | 0.5 g        | 2%                 | 1% F68                | 252.93 $\pm$ 6                     | 0.38 $\pm$ 0.04                   | 0.77 $\pm$ 0.64                    |
| 43        | 1.5mL tube        | ZSBO5        | 0.5 g        | 2%                 | 2% F68                | 255.97 $\pm$ 12.5                  | 0.35 $\pm$ 0.12                   | 0.43 $\pm$ 0.13                    |
| 44        | 1.5mL tube        | ZSBO5        | 0.5 g        | 2%                 | 3% F68                | 237.43 $\pm$ 3.3                   | 0.22 $\pm$ 0.02                   | -0.09 $\pm$ 0.34                   |
| 45        | 1.5mL tube        | ZSBO5        | 0.5 g        | 2%                 | 1% TPGS               | 293.4 $\pm$ 12.3                   | 0.47 $\pm$ 0.02                   | 0.72 $\pm$ 0.58                    |
| 46        | 1.5mL tube        | ZSBO5        | 0.5 g        | 2%                 | 2% TPGS               | 329.4 $\pm$ 22.6                   | 0.55 $\pm$ 0.03                   | 0.5 $\pm$ 0.85                     |
| 47        | 1.5mL tube        | ZSBO5        | 0.5 g        | 2%                 | 3% TPGS               | 269.13 $\pm$ 4.9                   | 0.51 $\pm$ 0.04                   | 1.08 $\pm$ 0.4                     |
| 48        | 1.5mL tube        | ZSBO5        | 0.5 g        | 6%                 | 1% HS15               | 374.87 $\pm$ 105.6                 | 0.6 $\pm$ 0.35                    | -7.78 $\pm$ 3.77                   |
| 49        | 1.5mL tube        | ZSBO5        | 0.5 g        | 6%                 | 2% HS15               | 440.3 $\pm$ 312.4                  | 0.66 $\pm$ 0.3                    | -16.53 $\pm$ 1.21                  |
| 50        | 1.5mL tube        | ZSBO5        | 0.5 g        | 6%                 | 3% HS15               | 251.1 $\pm$ 23.2                   | 0.66 $\pm$ 0.08                   | -11.91 $\pm$ 2.92                  |
| 51        | 1.5mL tube        | ZSBO5        | 0.5 g        | 6%                 | 1% F68                | 346.87 $\pm$ 28.2                  | 0.31 $\pm$ 0.04                   | -10.46 $\pm$ 3.68                  |
| 52        | 1.5mL tube        | ZSBO5        | 0.5 g        | 6%                 | 2% F68                | 241.23 $\pm$ 9.9                   | 0.2 $\pm$ 0.05                    | -0.96 $\pm$ 0.75                   |
| 53        | 1.5mL tube        | ZSBO5        | 0.5 g        | 6%                 | 3% F68                | 220.9 $\pm$ 2.8                    | 0.2 $\pm$ 0.06                    | -1.22 $\pm$ 1.26                   |
| 54        | 1.5mL tube        | ZSBO5        | 0.5 g        | 6%                 | 1% TPGS               | 214.47 $\pm$ 20.2                  | 0.31 $\pm$ 0.13                   | -8.34 $\pm$ 1.73                   |
| 55        | 1.5mL tube        | ZSBO5        | 0.5 g        | 6%                 | 2% TPGS               | 229.07 $\pm$ 12.2                  | 0.54 $\pm$ 0.08                   | -10.7 $\pm$ 1.66                   |
| 56        | 1.5mL tube        | ZSBO5        | 0.5 g        | 6%                 | 3% TPGS               | 214 $\pm$ 1.9                      | 0.52 $\pm$ 0.07                   | -13.53 $\pm$ 1.7                   |

**Table S2. Pup behavior fail rates.** Percentage and number of pups failing each task are shown. Failures were not included in data shown in Figure 3F-K or in Figure 7E-J.

| <b>Cliff Aversion</b>    | <b>PND 5</b> | <b>PND 9</b>  | <b>PND 15</b> | <b>PND 17</b> | <b>PND 22</b> |
|--------------------------|--------------|---------------|---------------|---------------|---------------|
| Saline                   | 27% (n=16)   | 0% (n=0)      | -             | -             | -             |
| LPS + P4/TSA NS          | 24% (n=7)    | 0% (n=0)      | -             | -             | -             |
| <b>Negative Geotaxis</b> | <b>PND 5</b> | <b>PND 9</b>  | <b>PND 15</b> | <b>PND 17</b> | <b>PND 22</b> |
| Saline                   | 93% (n=55)   | 51% (n=30)    | -             | -             | -             |
| LPS + P4/TSA NS          | 96% (n=29)   | 58% (n=17)    | -             | -             | -             |
| <b>Surface Righting</b>  | <b>PND 5</b> | <b>PND 9</b>  | <b>PND 15</b> | <b>PND 17</b> | <b>PND 22</b> |
| Saline                   | 12% (n=7)    | 0% (n=0)      | -             | -             | -             |
| LPS + P4/TSA NS          | 14% (n=4)    | 0% (n=0)      | -             | -             | -             |
| <b>Open Field</b>        | <b>PND 9</b> | <b>PND 13</b> | <b>PND 15</b> | <b>PND 17</b> | <b>PND 22</b> |
| Saline                   | 55% (n=32)   | 7% (n=4)      | 0% (n=0)      | 3% (n=2)      | 0% (n=0)      |
| LPS + P4/TSA NS          | 52% (n=16)   | 0% (n=0)      | 3% (n=1)      | 0% (n=0)      | 0% (n=0)      |
| <b>Cliff Aversion</b>    | <b>PND 8</b> | <b>PND 10</b> | <b>PND 15</b> | <b>PND 17</b> | <b>PND 22</b> |
| Saline                   | 6% (n=3)     | -             | 44% (n=19)    | -             | -             |
| LPS + SAHA NS            | 0% (n=0)     | -             | 32% (n=15)    | -             | -             |
| LPS + P4/SAHA NS         | 0% (n=0)     | -             | 23% (n=12)    | -             | -             |
| <b>Negative Geotaxis</b> | <b>PND 8</b> | <b>PND 10</b> | <b>PND 15</b> | <b>PND 17</b> | <b>PND 22</b> |
| Saline                   | 69% (n=30)   | -             | 6% (n=3)      | -             | -             |
| LPS + SAHA NS            | 21% (n=10)   | -             | 4% (n=2)      | -             | -             |
| LPS + P4/SAHA NS         | 31% (n=12)   | -             | 0% (n=0)      | -             | -             |
| <b>Surface Righting</b>  | <b>PND 8</b> | <b>PND 10</b> | <b>PND 15</b> | <b>PND 17</b> | <b>PND 22</b> |
| Saline                   | 0% (n=0)     | -             | 0% (n=0)      | -             | -             |
| LPS + SAHA NS            | 0% (n=0)     | -             | 0% (n=0)      | -             | -             |
| LPS + P4/SAHA NS         | 0% (n=0)     | -             | 0% (n=0)      | -             | -             |
| <b>Open Field</b>        | <b>PND 8</b> | <b>PND 10</b> | <b>PND 15</b> | <b>PND 17</b> | <b>PND 22</b> |
| Saline                   | 75% (n=33)   | 19% (n=8)     | 0% (n=0)      | 0% (n=0)      | 0% (n=0)      |
| LPS + SAHA NS            | 68% (n=33)   | 18% (n=9)     | 0% (n=0)      | 0% (n=0)      | 0% (n=0)      |
| LPS + P4/SAHA NS         | 69% (n=27)   | 53% (n=21)    | 0% (n=0)      | 0% (n=0)      | 0% (n=0)      |

**Table S3. Antibodies used in Western blotting.** Primary and secondary antibodies used for western blotting. \* indicates an antibody that was tested, but failed to visualize murine PR.

| <b>Antigen</b> | <b>Antibody</b> | <b>Dilution</b>   | <b>Supplier</b>           |
|----------------|-----------------|-------------------|---------------------------|
| GAPDH          | sc-32233        | 1:1000 in 1% BSA  | Santa Cruz                |
| Mouse IgG      | 715-035-150     | 1:10000 in 1% BSA | Jackson<br>ImmunoResearch |
| PR             | M356801-2       | 1:1000 in 1% BSA  | Agilent                   |
| PR *           | MA5-12658       | 1:400 in 1% BSA   | Invitrogen                |
| PR *           | sc-810          | 1:4000 in 1% BSA  | Santa Cruz                |
| PR *           | #8757           | 1:1000 in 1% BSA  | Cell Signal               |

**Table S4. Primer sequences.** Forward and reverse primer sequences used in RT-qPCR experiments.

|                                     |    |                                           |
|-------------------------------------|----|-------------------------------------------|
| <b><i>Rplp0</i></b>                 | F: | 5'- CAC TGG TCT AGG ACC CGA GAA G -3'     |
|                                     | R: | 5'- GGT GCC TCT GGA GAT TTT CG -3'        |
| <b><i>Adamts1</i></b>               | F: | 5'- AGT TAC CTC CAA TGC AGC TCT CA -3'    |
|                                     | R: | 5'- ATC CCG AGA GTG TCA CAC GTG T -3'     |
| <b><i>Ccl3</i></b>                  | F: | 5'- AGC TGA CAC CCC GAC TGC CT -3'        |
|                                     | R: | 5'- TCA GGA AAA TGA CAC CTG GCT GGG A -3' |
| <b><i>Cx43</i></b>                  | F: | 5'- GCC CGA ACT CTC CTT TTC CT -3'        |
|                                     | R: | 5'- CAT GTC TGG GCA CCT CTC TTT -3'       |
| <b><i>Cox2</i></b>                  | F: | 5'- CAG CCA GGC AGC AAA TCC -3'           |
|                                     | R: | 5'- ACA TTC CCC ACG GTT TTG AC -3'        |
| <b><i>Il1<math>\beta</math></i></b> | F: | 5'- GAA ATG CCA CCT TTT GAC AGT G -3'     |
|                                     | R: | 5'- TGG ATG CTC TCA TCA GGA CAG -3'       |
| <b><i>Il6</i></b>                   | F: | 5'- CCT CTC TGC AAG AGA CTT CC -3'        |
|                                     | R: | 5'- CTC CGG ACT TGT GAA GTA GG -3'        |
| <b><i>Mmp8</i></b>                  | F: | 5'- CAC GCA CCC TAT GAG GAC AA-3'         |
|                                     | R: | 5'- GCA GGA CAC GTG GGA TGA GT-3'         |
| <b><i>Nfkb1</i></b>                 | F: | 5'- ATG GCA GAC GAT GAT CCC TAC -3'       |
|                                     | R: | 5'- CGG AAT CGA AAT CCC CTC TGT T -3'     |
| <b><i>Oxtr</i></b>                  | F: | 5'- GAT CAC GCT CGC CGT CTA C -3'         |
|                                     | R: | 5'- CCG TCT TGA GTC GCA GAT TC -3'        |
| <b><i>Zeb1</i></b>                  | F: | 5'- ACT GCA AGA AAC GGT TTT CCC -3'       |
|                                     | R: | 5'- GGC GAG GAA CAC TGA GAT GT -3'        |
